# Supplementary material for: Evaluation of a novel personal nanoparticle sampler
Source: Royal Society of Chemistry journal article supplement (doi:10.1039/c3em00497j), 2013-11-25
Supplement: c3em00497j.pdf [file c3em00497j.pdf]

## **Supplemental Information for**

Evaluation of a Novel Personal Nanoparticle Sampler

Yue Zhou, Hammad Irshad, Chuen-Jinn Tsai, Shao-Ming Hung, and Yung-Sung Cheng

Supporting information contains two additional figures regarding method section.

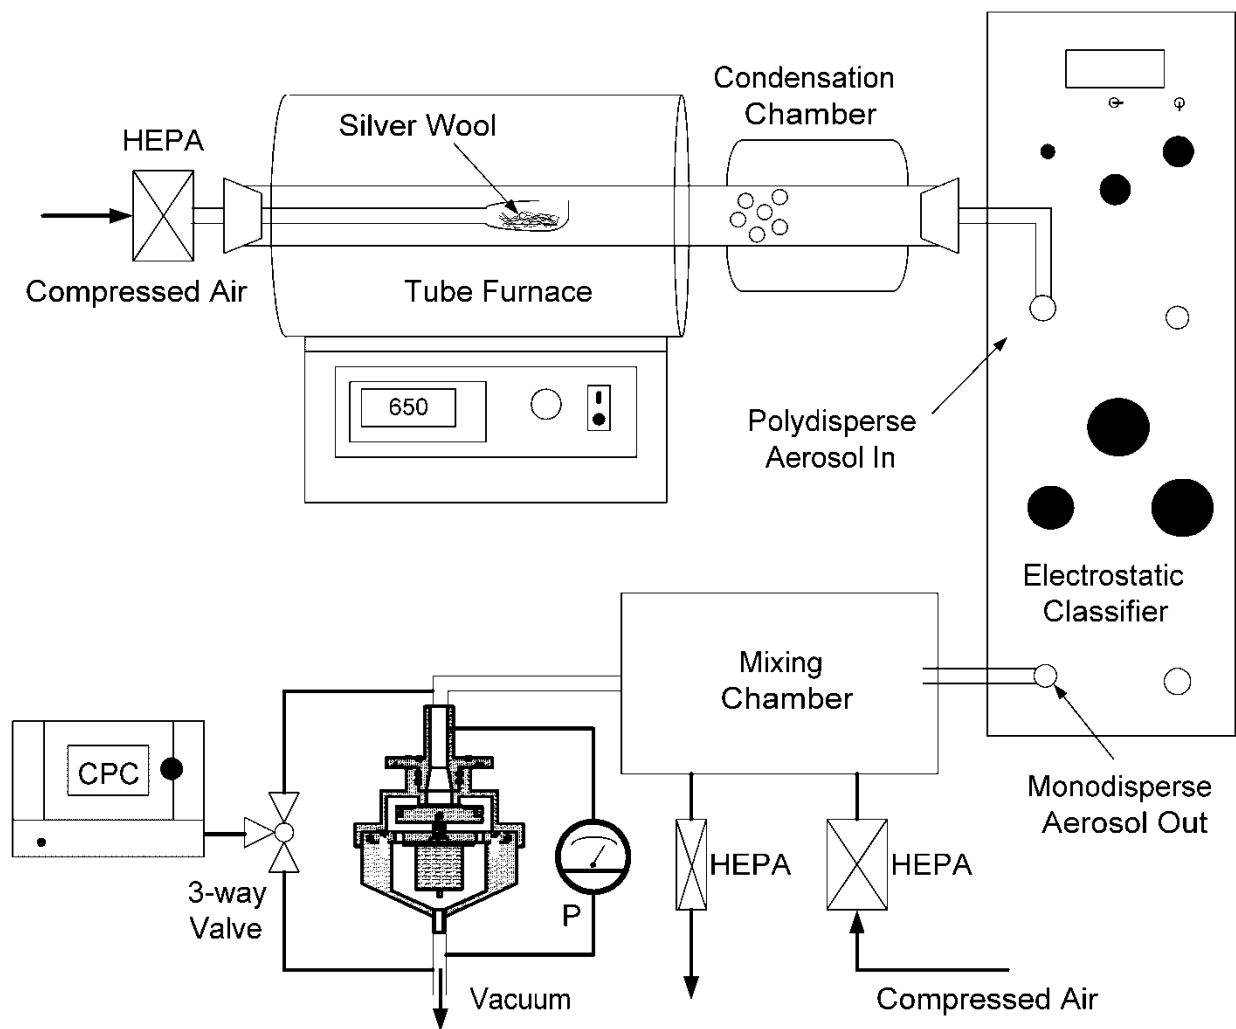

FIGURE S1. Schematic diagram of experimental setup for the impactor part of the PENS.

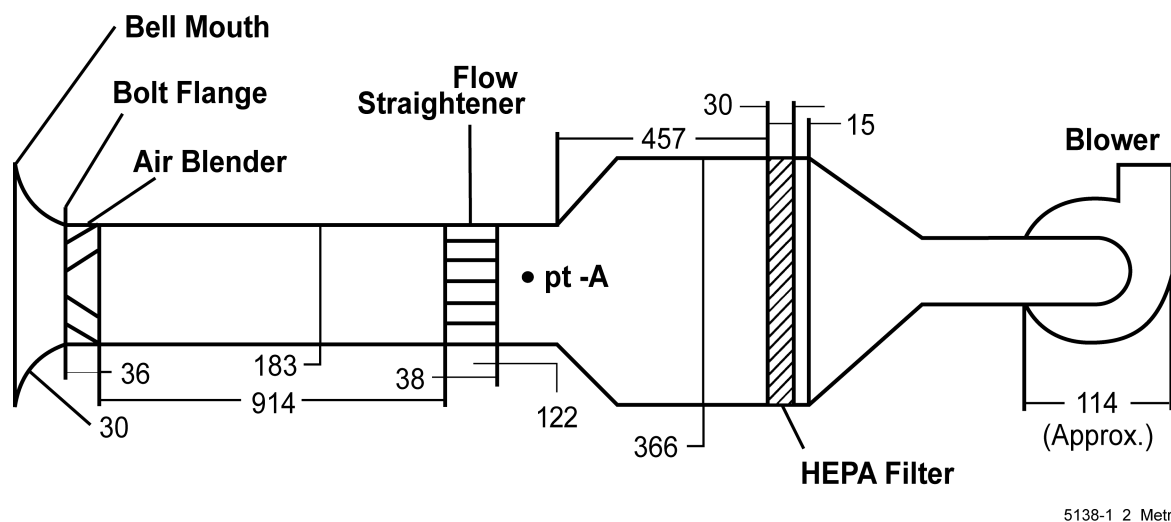

FIGURE S2. Schematic of wind tunnel with measurement in centimeters. (Adapted from Figure 1 of Cheng et al.)

## REFERENCE

Cheng, Y.S., H. Irshad, A.R. Mcfarland, W-C. Su, Y. Zhou, and D. Barringer: An aerosol wind tunnel for evaluation of massive-flow air samplers and calibration of snow white sampler. *Aerosol Sci. Technol.* 38:1099-1107 (2004).
